# Supplementary material for: The robustness of the terminal emitter site in major LHCII complexes controls xanthophyll function during photoprotection
Source: Royal Society of Chemistry journal article supplement (doi:10.1039/d0pp00174k), 2020-08-14
Supplement: d0pp00174k1.pdf [file d0pp00174k1.pdf]

Supplementary Figure 1, Saccon et al.

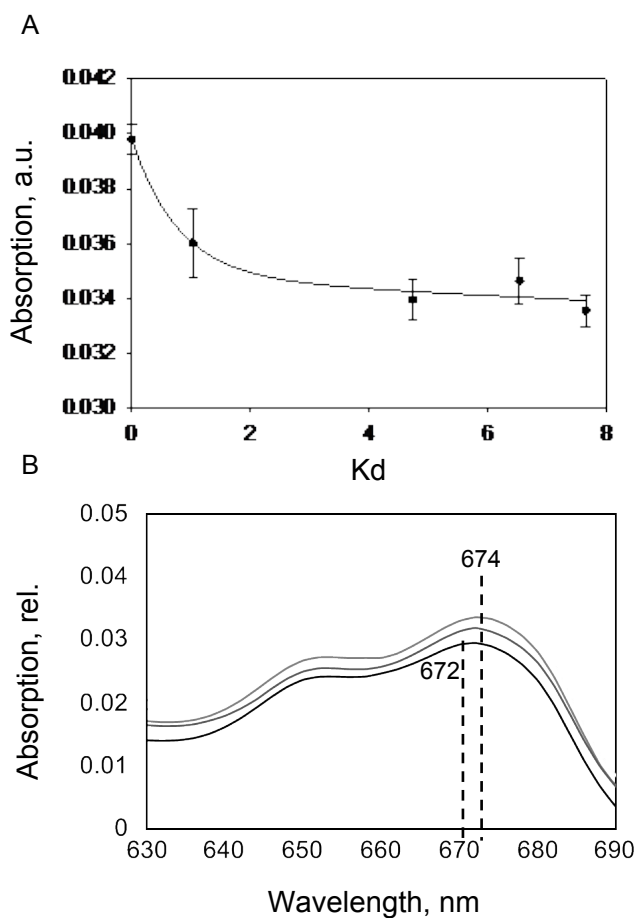

**Figure S1.** Chlorophyll  $Q_y$  absorption changes upon quenching in WT LHClI monomers. (A) Absorption loss upon quenching induction. Quenching is expressed as  $Kd = (F_{unquenched} - F_{quenched}) / F_{quenched}$ , where  $F$  is the chlorophyll fluorescence value measured via PAM fluorimetry. Data are the mean of 4 replicates  $\pm$ SD (B) Shift of the maximum  $Q_y$  position upon quenching. Spectra are offset for clarity. The total Chl concentration of the LHClI samples was 10  $\mu$ g/ml.

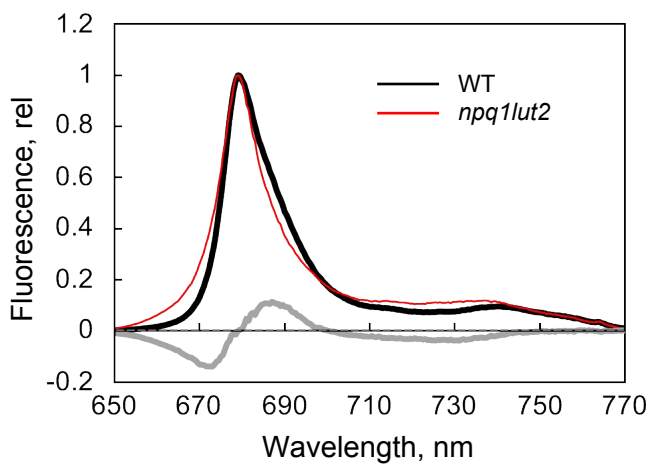

**Figure S2.** Normalised chlorophyll *a* low-temperature fluorescence emission spectra of unquenched LHCII monomers. Grey, difference spectrum.
